# Supplementary material for: Holocene Hydroclimate in the Southeastern United States During Abrupt Climate Events: Evidence From New Speleothem Isotopic Records From Alabama
Source: Research Square preprint supplement (doi:10.21203/rs.3.rs-152650/v1), 2021-02-01
Supplement: Supplementary file 5 [file 9e1149074766a8d8b840fe26.xlsx]

## Sheet: Sheet1
d18O dripwater	d18Owater VPDB	Temp ºC	Mean Temp en °K	d18O calcite from Kim and Oneil 1997 modified by Tremaine based on Kim et al. 2007	d18Ocalcite Tremaine et al 2011	d18Ocalcite Friedman and O Neil 1977 AVG	d18Ocalcite Chacko and Deines 2008	d18O Affek and Zaarur et al. 2014	d18O calcite Hansen et al. 2019 AVG
-5.9	-35.42	15	288.15	-5.64494	-6.56717	-5.45586	-5.92165	-5.09689	-4.87422
-3.9	-33.5	15	288.15	-3.66567	-4.58974	-3.47622	-3.94293	-3.11653	-2.89342
References:
Kim S. T. and O’Neil J. R. (1997) Equilibrium and nonequilibrium oxygen isotope effects in synthetic carbonates. Geochim. Cosmochim. Acta 61, 3461–3475.
Friedman I. and O'Neil J.R. 1977. Compilation of stable isotope fractionation factors of geochemical interest. In: US Geological Survey Professional Paper 440-KK, Data of Geochemistry, pp. 6.
Chacko T. and Deines P. (2008) Theoretical calculation of oxygen isotope fractionation factors in carbonate systems. Geochim. Cosmochim. Acta 72, 3642–3660.
Tremaine, D.M., Froelich, P.N., Wang, Y., 2011. Speleothem calcite farmed in situ:
Modern calibration of δ18O and δ13C paleoclimate proxies in a continuously-monitored
natural cave system. Geochim. Cosmochim. Acta 75, 4929–4950.
Affek, H. P., & Zaarur, S. (2014). Kinetic isotope effect in CO2 degassing: Insight from clumped and oxygen isotopes in laboratory precipitation experiments. Geochimica et Cosmochimica Acta, 143, 319-330.
Hansen, M., Scholz, D., Schöne, B. R., & Spötl, C. (2019). Simulating speleothem growth in the laboratory: Determination of the stable isotope fractionation (δ13C and δ18O) between H2O, DIC and CaCO3. Chemical Geology, 509, 20-44.

## Sheet: Readme
References:
