# Supplementary material for: Holocene Hydroclimate in the Southeastern United States During Abrupt Climate Events: Evidence From New Speleothem Isotopic Records From Alabama
Source: Research Square preprint supplement (doi:10.21203/rs.3.rs-152650/v1), 2021-02-01
Supplement: Supplementary file 6 [file d91641eca5801a9a5e9c3e2f.xlsx]

## Sheet: Sheet1
Sample #	Distance from top (mm)	Age years BP (1950)	d18O	d13C
1	0.5	310	-2.88731	-0.17826
2	1	320	-3.48871	-2.35226
3	1.5	330	-3.32961	-1.37626
4	2	340	-3.06211	-0.97016
5	2.5	376	-3.74551	-2.55006
6	3	412	-3.60501	-2.31126
7	3.5	448	-3.68321	-2.71606
8	4	485	-3.41331	-2.40636
9	4.5	521	-3.63751	-2.28556
10	5	557	-3.46121	-2.26136
11	5.5	593	-3.61911	-2.86376
12	6	629	-3.56071	-2.97436
13	6.5	665	-3.66381	-3.07886
14	7	701	-3.66291	-2.97436
15	7.5	738	-3.97881	-2.80146
16	8	774	-3.53881	-2.62346
17	8.5	810	-3.67651	-2.58476
18	9	846	-3.20821	-1.15326
19	9.5	882	-3.04101	-0.63556
20	10	918	-3.55051	-2.10316
21	10.5	954	-3.48161	-2.42996
22	11	991	-3.34211	-1.94086
23	11.5	1027	-3.62301	-2.42566
24	12	1063	-3.72651	-2.60686
25	12.5	1099	-3.42651	-2.09816
26	13	1135	-3.25251	-1.05106
27	13.5	1171	-3.31911	-0.64386
28	14	1207	-3.06671	-0.63196
29	14.5	1244	-3.15381	-0.72686
30	15	1285	-2.97611	-1.08996
31	15.5	1393	-3.04991	-1.23656
32	16	1500	-2.64738	-1.47397
33	16.5	1608	-2.61098	-1.46997
34	17	1715	-2.56458	-1.76677
35	17.5	1823	-2.55468	-1.53727
36	18	1930	-2.58608	-1.91717
37	18.5	2038	-2.64398	-1.70327
39	19.5	2252	-2.87358	-0.985272
40	20	2360	-2.73008	-1.11477
41	20.5	2381	-2.50188	-0.00377222
42	21	2402	-2.77388	-0.774872
43	21.5	2423	-2.98538	-0.912872
44	22	2444	-2.78918	-0.724172
45	22.5	2465	-2.82558	-0.929272
46	23	2485	-2.67458	-0.386872
47	23.5	2506	-2.71088	-0.287772
48	24	2527	-2.88358	-0.432772
49	24.5	2548	-2.86458	-0.460772
50	25	2569	-2.84508	-0.354972
51	25.5	2590	-2.64668	-0.251372
52	26	2611	-3.31418	-1.09367
53	26.5	2632	-3.06978	-1.45627
54	27	2653	-3.31838	-1.68967
66	33	4300	-2.71868	-0.280872
67	33.5	4318	-3.44058	-1.57377
68	34	4336	-3.29878	-1.55327
69	34.5	4354	-3.07268	-0.996872
70	35	4372	-3.5053	-1.93428
71	35.5	4390	-3.4861	-2.10798
72	36	4409	-3.4634	-1.97368
73	36.5	4427	-3.3871	-1.57138
74	37	4445	-3.3636	-1.58658
75	37.5	4463	-3.4168	-1.49438
76	38	4481	-2.9788	-1.25278
77	38.5	4499	-3.387	-1.33198
78	39	4517	-3.408	-1.71368
79	39.5	4535	-3.4168	-1.81108
80	40	4553	-3.6511	-1.85118
81	40.5	4572	-3.5939	-1.78418
82	41	4590	-3.2238	-1.67168
83	41.5	4608	-3.4518	-1.78448
84	42	4626	-3.3478	-1.66218
85	42.5	4644	-3.4355	-1.70088
86	43	4662	-3.3552	-1.62888
87	43.5	4680	-3.3764	-1.36418
88	44	4698	-2.9531	-0.965983
89	44.5	4717	-2.7388	-0.234783
90	45	4735	-2.69679	0.41915
91	45.5	4753	-2.51179	0.33065
92	46	4771	-2.61179	0.67885
93	46.5	4789	-2.57559	0.81225
94	47	4807	-2.42149	1.05315
95	47.5	4825	-2.62779	0.91165
96	48	4843	-2.38189	0.91685
97	48.5	4861	-2.16109	2.11315
98	49	4880	-2.12509	2.46425
99	49.5	4898	-2.55309	1.67905
100	50	4916	-2.24389	2.24605
101	50.5	4934	-2.22189	1.64145
102	51	4952	-2.69569	0.23665
103	51.5	4970	-3.06939	-0.79445
104	52	4988	-3.56019	-0.93985
105	52.5	5006	-3.07629	-0.35365
106	53	5025	-2.93659	0.00355
107	53.5	5043	-3.06729	0.08045
108	54	5061	-3.21589	-0.57455
109	54.5	5079	-2.84639	0.42815
110	55	5092	-2.62219	0.98985
111	55.5	5098	-2.95219	0.31105
112	56	5103	-3.05309	-0.69795
113	56.5	5108	-2.67099	-0.13215
114	57	5114	-3.14849	-0.39775
115	57.5	5119	-2.54159	0.61005
116	58	5125	-2.97879	-0.74615
117	58.5	5130	-3.46219	-1.23995
118	59	5135	-3.30399	-0.97565
119	59.5	5141	-3.49519	-1.36065
120	60	5146	-3.45249	-1.26805
121	60.5	5151	-3.38949	-1.22035
122	61	5157	-3.62069	-1.60665
123	61.5	5162	-3.53639	-1.55185
124	62	5167	-3.52929	-1.52725
125	62.5	5173	-3.73879	-1.71365
126	63	5178	-3.79279	-1.72475
127	63.5	5183	-3.90189	-1.76875
128	64	5189	-3.74629	-1.72669
129	64.5	5194	-3.68219	-1.82089
130	65	5199	-3.61289	-1.83329
131	65.5	5205	-3.47709	-1.61639
132	66	5210	-3.71119	-1.45179
133	66.5	5216	-3.75526	-1.79626
134	67	5221	-3.71989	-1.82009
135	67.5	5226	-3.65549	-1.81249
136	68	5232	-3.85029	-1.70909
137	68.5	5237	-3.71019	-1.69899
138	69	5242	-3.65329	-1.72349
139	69.5	5248	-3.79529	-1.77739
140	70	5253	-3.76999	-1.72039
141	70.5	5258	-3.59649	-1.60709
142	71	5264	-3.99529	-1.71269
143	71.5	5269	-3.82139	-1.73249
144	72	5274	-3.83199	-2.00499
145	72.5	5280	-3.74739	-2.01999
146	73	5285	-3.71539	-1.79729
147	73.5	5290	-3.69979	-1.91559
148	74	5309	-3.74169	-2.01839
149	74.5	5327	-3.80869	-1.90639
150	75	5346	-3.77839	-2.19619
151	75.5	5364	-3.71509	-2.04309
152	76	5383	-3.6667	-1.85326
153	76.5	5401	-3.60449	-1.75959
154	77	5420	-3.76689	-1.92409
155	77.5	5438	-3.69889	-1.73209
156	78	5457	-3.65629	-1.53459
157	78.5	5475	-3.22549	-0.967694
158	79	5494	-2.77129	0.521206
159	79.5	5512	-2.63539	0.319206
160	80	5531	-2.80399	0.0586056
161	80.5	5549	-3.01409	-0.145694
162	81	5567	-3.41429	-1.06919
163	81.5	5586	-3.16279	-1.47609
164	82	5604	-3.02829	-0.646694
165	82.5	5623	-2.76029	-0.0191944
166	83	5641	-2.30889	0.824906
167	83.5	5660	-3.04479	0.00750556
168	84	5678	-2.30349	1.02851
169	84.5	5697	-2.44799	0.891306
170	85	5715	-2.62439	0.663806
171	85.5	5734	-2.92149	-0.0612944
172	86	5752	-3.43079	-1.73649
173	86.5	5771	-3.03369	-0.639494
174	87	5789	-2.40079	0.478206
175	87.5	5808	-2.26899	1.30971
176	88	5839	-2.48839	0.921406
177	88.5	5871	-2.16369	1.24861
178	89	5904	-2.26979	1.38641
179	89.5	5937	-2.38389	1.18871
180	90	5970	-2.53549	0.641006
181	90.5	6002	-2.63869	0.191906
182	91	6035	-2.31229	0.745806
183	91.5	6068	-2.42659	1.11501
184	92	6101	-2.39569	0.966206
185	92.5	6133	-2.46959	0.610306
186	93	6166	-3.19649	-1.58479
187	93.5	6199	-2.93459	-1.20539
188	94	6232	-2.94479	-1.27519
189	94.5	6264	-2.77139	-1.40599
190	95	6297	-2.92704	-1.89582
191	95.5	6330	-2.59259	-0.771094
192	96	6363	-2.46999	-0.132394
193	96.5	6395	-2.52889	-0.593894
194	97	6428	-2.85989	-1.47909
195	97.5	6461	-2.84419	-1.35629
196	98	6494	-2.77769	-1.11959
197	98.5	6527	-2.91429	-1.90539
198	99	6559	-2.93509	-1.89439
199	99.5	6592	-3.05069	-1.84139
200	100	6625	-3.22339	-2.35259
201	100.5	6658	-3.34909	-2.49689
202	101	6690	-3.33709	-1.93659
203	101.5	6723	-2.92099	-1.90019
204	102	6756	-3.06319	-2.51909
205	102.5	6789	-3.18927	-1.61918
206	103	6821	-2.95757	-1.53998
207	103.5	6854	-3.04807	-1.66987
208	104	6881	-3.04478	-1.95528
209	104.5	6901	-3.03967	-1.95237
210	105	6920	-3.48548	-2.72887
211	105.5	6939	-3.07647	-2.03218
212	106	6958	-3.59198	-2.49058
213	106.5	6977	-3.49817	-2.52738
214	107	6997	-3.32428	-2.40817
215	107.5	7016	-3.29208	-2.55428
216	108	7035	-3.35288	-2.78408
217	108.5	7054	-3.40307	-2.38747
218	109	7073	-3.56718	-2.53468
219	109.5	7093	-3.46577	-2.71548
220	110	7112	-3.45397	-2.76708
221	110.5	7131	-3.46488	-2.59198
222	111	7150	-3.32998	-2.84947
223	111.5	7169	-3.27617	-2.27968
224	112	7189	-3.44028	-2.56108
225	112.5	7208	-3.39597	-2.49867
226	113	7227	-3.58628	-2.50798
227	113.5	7246	-3.39677	-2.61638
228	114	7265	-3.31498	-2.74147
229	114.5	7285	-3.33154	-2.80885
230	115	7304	-3.05377	-2.65247
231	115.5	7323	-3.49248	-2.76207
232	116	7342	-3.32187	-2.89628
233	116.5	7361	-3.38017	-2.80377
234	117	7381	-3.50928	-3.00347
235	117.5	7400	-3.81928	-3.00407
236	118	7419	-3.55107	-2.89547
237	118.5	7438	-3.61578	-2.94307
238	119	7457	-3.58367	-3.01317
239	119.5	7477	-3.59337	-2.92888
240	120	7496	-3.61777	-2.46738
241	120.5	7515	-3.47187	-2.27707
242	121	7534	-3.31447	-2.21407
243	121.5	7553	-3.51498	-2.58347
244	122	7573	-3.53313	-2.32592
245	122.5	7592	-3.50402	-2.49883
246	123	7611	-3.50053	-2.48033
247	123.5	7630	-3.53733	-2.63293
248	124	7650	-3.27102	-2.00093
249	124.5	7669	-3.06082	-1.94243
250	125	7688	-3.49432	-2.84503
251	125.5	7707	-3.51222	-3.54252
252	126	7726	-3.52942	-3.62913
253	126.5	7746	-3.35493	-3.23113
254	127	7765	-3.12922	-2.84032
255	127.5	7784	-3.36802	-3.46482
256	128	7803	-3.38682	-3.50453
257	128.5	7822	-3.54933	-3.80012
258	129	7842	-4.06553	-3.83243
259	129.5	7861	-3.56073	-3.54853
260	130	7880	-3.47112	-3.16412
261	130.5	7899	-3.63472	-3.63013
262	131	7918	-3.85803	-3.79783
263	131.5	7938	-3.40903	-3.62252
264	132	7957	-3.61232	-3.43303
265	132.5	7976	-3.51903	-3.29113
266	133	7995	-3.69073	-3.75033
267	133.5	8004	-3.70213	-3.68553
268	134	8008	-3.68105	-3.68743
269	134.5	8012	-3.38083	-3.60902
270	135	8016	-3.48473	-3.47253
271	135.5	8020	-3.86172	-3.99973
272	136	8024	-3.48813	-3.80293
273	136.5	8028	-3.59662	-3.48062
274	137	8032	-3.55912	-3.37732
275	137.5	8035	-3.58033	-3.56683
276	138	8039	-3.64852	-3.52252
277	138.5	8043	-3.80432	-3.58003
278	139	8047	-3.48762	-3.31833
279	139.5	8051	-3.39953	-3.26383
280	140	8055	-3.40492	-3.29873
281	140.5	8059	-3.20863	-3.07503
282	141	8063	-3.59282	-3.15813
283	141.5	8067	-3.19793	-3.02953
284	142	8071	-3.47809	-3.22177
285	142.5	8075	-3.44009	-3.25747
286	143	8079	-3.57669	-3.20417
287	143.5	8083	-3.58549	-3.19637
288	144	8087	-3.69579	-3.30597
289	144.5	8091	-3.69399	-3.64447
290	145	8095	-3.45929	-3.28607
291	145.5	8099	-3.75249	-3.57777
292	146	8103	-3.57609	-3.39757
293	146.5	8107	-3.55579	-3.45397
294	147	8111	-3.48619	-3.16847
295	147.5	8115	-3.29839	-2.97867
296	148	8119	-3.24359	-2.94057
297	148.5	8123	-3.15659	-2.95547
298	149	8127	-3.39409	-2.92517
299	149.5	8131	-3.44759	-3.23797
300	150	8135	-3.62409	-3.49757
301	150.5	8139	-3.39269	-2.92167
302	151	8143	-3.27421	-2.96949
303	151.5	8147	-3.30669	-3.07137
304	152	8151	-3.27879	-3.15287
305	152.5	8155	-3.40219	-3.31917
306	153	8159	-3.20039	-2.86577
307	153.5	8163	-3.49709	-3.03157
308	154	8167	-3.44799	-3.47347
309	154.5	8171	-3.36909	-3.62937
310	155	8175	-3.35599	-3.57317
311	155.5	8179	-3.25669	-3.52277
312	156	8183	-3.68299	-3.78367
313	156.5	8187	-3.40719	-3.93847
314	157	8191	-3.37679	-3.89067
315	157.5	8195	-3.48729	-3.86697
316	158	8199	-3.37669	-3.83787
317	158.5	8203	-3.7203	-3.89394
318	159	8206	-3.7126	-3.77794
319	159.5	8210	-3.9031	-3.77194
320	160	8214	-3.7952	-3.55704
321	160.5	8218	-4.2955	-3.47104
322	161	8222	-3.6752	-3.47104
323	161.5	8226	-3.8149	-3.70814
324	162	8230	-3.332	-3.70814
325	162.5	8234	-2.9641	-2.81124
326	163	8238	-3.2606	-2.06884
327	163.5	8242	-3.1975	-1.97764
328	164	8246	-3.5915	-2.35954
329	164.5	8250	-3.4188	-2.31924
330	165	8254	-3.8465	-3.34364
331	165.5	8258	-3.8743	-3.55904
332	166	8262	-3.4221	-3.62924
333	166.5	8266	-3.4904	-3.69994
334	167	8270	-3.4743	-3.60284
335	167.5	8274	-3.3824	-3.63934
336	168	8278	-3.2867	-3.65074
337	168.5	8282	-3.1763	-3.49354
338	169	8286	-2.8825	-3.40864
339	169.5	8290	-3.0017	-3.22714
340	170	8294	-3.0392	-2.82104
341	170.5	8298	-3.22843	-3.10854
342	171	8302	-2.8001	-3.18864
343	171.5	8306	-2.8112	-3.39305
344	172	8310	-2.7337	-2.98474
345	172.5	8314	-3.0517	-3.13004
346	173	8318	-3.4192	-3.10424
347	173.5	8322	-3.3322	-3.31324
348	174	8326	-3.2058	-3.52254
349	174.5	8330	-3.1093	-3.70604
350	175	8334	-3.1507	-3.61664
351	175.5	8338	-3.1801	-3.71994
352	176	8342	-3.0217	-3.76194
353	176.5	8346	-3.2321	-3.76174
354	177	8350	-3.2785	-3.48164
355	177.5	8354	-3.2994	-3.55224
356	178	8358	-3.0362	-3.71464
357	178.5	8362	-3.4967	-3.64504
358	179	8366	-3.2601	-3.48984
359	179.5	8370	-3.2588	-3.75726
360	180	8373	-3.29	-3.38686
361	180.5	8377	-3.4594	-3.12266
362	181	8381	-3.6622	-3.24066
363	181.5	8385	-3.6249	-3.30006
364	182	8389	-3.7248	-3.44426
365	182.5	8393	-3.5531	-3.50466
366	183	8397	-3.4625	-3.65886
367	183.5	8401	-3.5987	-3.55236
368	184	8405	-3.6694	-3.56566
369	184.5	8409	-3.4278	-3.64736
370	185	8413	-3.6637	-3.65246
371	185.5	8417	-3.7982	-3.45526
372	186	8421	-3.6861	-3.89986
373	186.5	8425	-3.8223	-3.97826
374	187	8429	-3.6948	-3.68766
375	187.5	8433	-3.8254	-3.86536
376	188	8437	-3.507	-3.85506
378	189	8445	-3.5522	-3.40316
379	189.5	8449	-3.5083	-3.42416
380	190	8456	-3.6316	-3.39696
381	190.5	8466	-3.443	-3.48226
382	191	8475	-3.3515	-3.21726
383	191.5	8484	-3.3252	-2.9779
384	192	8493	-3.7133	-3.36506
387	193.5	8521	-3.6474	-3.24996
388	194	8530	-3.4941	-3.35886
389	194.5	8540	-3.04	-2.08836
390	195	8549	-3.0101	-2.68566
391	195.5	8558	-3.271	-2.96506
392	196	8567	-3.4394	-3.61356
393	196.5	8577	-3.5802	-3.74196
394	197	8586	-3.4767	-3.70756
395	197.5	8595	-3.4382	-4.02426
396	198	8604	-3.3389	-4.05796
397	198.5	8614	-3.41776	-3.59654
398	199	8623	-3.60956	-3.74754
399	199.5	8632	-3.73966	-3.79004
400	200	8641	-3.51656	-3.57174
401	200.5	8651	-3.08746	-3.36224
402	201	8660	-3.25176	-3.35134
403	201.5	8669	-3.46686	-3.72584
404	202	8678	-3.66986	-3.96964
405	202.5	8688	-3.72496	-4.21184
406	203	8697	-3.35796	-3.90354
407	203.5	8706	-3.16026	-3.81184
408	204	8715	-3.35536	-3.77894
409	204.5	8725	-3.59076	-4.15084
410	205	8734	-3.50086	-4.55314
411	205.5	8743	-3.56816	-4.32564
412	206	8752	-3.46266	-4.11324
413	206.5	8762	-3.22046	-4.04584
414	207	8771	-3.25763	-3.83295
415	207.5	8780	-3.38836	-4.41974
416	208	8789	-3.43666	-4.02104
417	208.5	8799	-3.68856	-4.23834
418	209	8808	-3.39606	-4.12884
419	209.5	8817	-3.66936	-4.29414
420	210	8826	-3.49456	-4.79454
421	210.5	8836	-3.66856	-4.87974
422	211	8845	-3.20956	-4.30884
423	211.5	8854	-3.56746	-4.57724
424	212	8863	-3.28496	-4.20514
425	212.5	8873	-3.55276	-4.33274
426	213	8882	-3.18226	-4.07924
427	213.5	8891	-3.46756	-4.34014
428	214	8900	-3.31536	-4.13444
429	214.5	8910	-3.38546	-4.68314
430	215	8919	-3.79449	-4.43503
431	215.5	8928	-3.45979	-3.89193
432	216	8937	-3.64449	-3.82253
433	216.5	8947	-3.68189	-4.21293
434	217	8956	-3.68579	-4.44573
435	217.5	8965	-3.69599	-4.36372
436	218	8974	-3.61709	-4.38122
437	218.5	8984	-3.64559	-4.39832
438	219	8993	-3.50959	-4.29643
439	219.5	9002	-3.40049	-4.36463
440	220	9011	-3.59399	-4.16483
441	220.5	9021	-3.61939	-4.22562
442	221	9030	-3.65059	-4.08512
443	221.5	9039	-3.75189	-4.40702
444	222	9048	-3.41529	-4.37423
445	222.5	9058	-3.51639	-4.36032
446	223	9067	-3.27609	-4.36193
447	223.5	9076	-3.37673	-4.40344
448	224	9085	-3.78509	-4.69172
449	224.5	9095	-3.50769	-4.32052
450	225	9104	-3.39539	-4.57782
451	225.5	9113	-3.43219	-4.55642
452	226	9122	-3.31159	-4.62153
453	226.5	9132	-3.30569	-4.42232
454	227	9141	-3.36269	-4.41563
455	227.5	9150	-3.09579	-4.36313
456	228	9159	-3.51379	-4.41263
457	228.5	9169	-3.50679	-4.35283
458	229	9178	-3.44149	-4.48942
459	229.5	9187	-3.51519	-4.56342
460	230	9196	-3.78299	-4.58122
461	230.5	9206	-3.28039	-4.62582
462	231	9215	-3.48789	-4.72122
463	231.5	9224	-3.67929	-4.67192
465	232.5	9243	-3.6293	-4.3045
466	233	9252	-3.7136	-4.4137
467	233.5	9261	-3.6965	-4.3242
468	234	9270	-3.4332	-4.3387
469	234.5	9280	-4.1266	-4.1798
470	235	9289	-3.448	-4.0009
471	235.5	9298	-3.908	-4.1791
472	236	9307	-3.7291	-4.3371
473	236.5	9317	-3.7845	-4.4505
474	237	9326	-3.8878	-4.526
475	237.5	9335	-3.8755	-4.435
476	238	9342	-4.0978	-4.5089
477	238.5	9347	-3.759	-4.4499
478	239	9353	-3.2732	-4.2737
479	239.5	9358	-3.2989	-4.4354
480	240	9363	-3.2329	-4.4565
481	240.5	9368	-3.35176	-4.48337
484	242	9384	-3.321	-4.2975
485	242.5	9389	-3.3352	-4.405
486	243	9394	-3.4958	-4.5046
487	243.5	9399	-3.6674	-4.78
488	244	9404	-3.2681	-4.6096
489	244.5	9409	-3.3794	-4.6097
499	249.5	10814	-2.628	-2.87201
500	250	10822	-2.4248	-2.97131
501	250.5	10829	-2.8275	-3.10261
502	251	10837	-2.9524	-3.23861
503	251.5	10844	-3.0298	-2.82061
504	252	10852	-2.9759	-3.42811
505	252.5	10860	-2.7057	-3.87131
506	253	10867	-2.8713	-4.25801
507	253.5	10875	-3.1669	-4.16181
508	254	10882	-3.3831	-4.00421
509	254.5	10890	-3.1763	-4.17271
510	255	10897	-3.0249	-4.08911
511	255.5	10905	-3.2759	-4.56211
512	256	10912	-2.8447	-4.23881
513	256.5	10920	-3.38	-4.10631
514	257	10927	-3.2128	-4.02561
515	257.5	10935	-3.3083	-3.69121
516	258	10943	-3.3483	-4.41721
517	258.5	10950	-3.0853	-4.33591
518	259	10958	-3.4929	-4.20261
519	259.5	10965	-3.5417	-4.29371
520	260	10973	-3.5119	-4.20711
521	260.5	10980	-3.2055	-4.26701
522	261	10988	-3.4562	-4.25811
523	261.5	10995	-3.3808	-4.23081
524	262	11003	-3.4669	-4.49601
525	262.5	11010	-3.4243	-4.26631
526	263	11018	-3.6067	-4.16411
527	263.5	11026	-3.6083	-4.25711
528	264	11033	-3.7437	-3.82221
529	264.5	11041	-3.3155	-2.01111
530	265	11048	-3.3409	-2.39871
531	265.5	11056	-2.5167	-3.85321
532	266	11063	-2.6909	-3.68231
533	266.5	11071	-3.4202	-3.57981
534	267	11078	-3.2776	-3.23778
535	267.5	11086	-3.548	-3.11831
536	268	11094	-3.27433	-3.61221
537	268.5	11101	-2.9193	-3.57193
538	269	11109	-3.37207	-3.59633
539	269.5	11116	-3.43511	-3.58933
540	270	11124	-3.43191	-3.80223
541	270.5	11131	-3.32431	-3.85803
542	271	11139	-3.44221	-3.86293
543	271.5	11146	-3.57301	-3.77273
544	272	11154	-3.30811	-3.67853
545	272.5	11162	-3.63121	-4.05473
546	273	11169	-3.28111	-4.13913
547	273.5	11177	-3.49731	-4.09663
548	274	11184	-3.61971	-4.13773
549	274.5	11192	-3.52421	-4.14363
550	275	11199	-3.36571	-4.06793
551	275.5	11207	-3.29111	-4.04663
552	276	11214	-3.30881	-3.91813
553	276.5	11222	-3.50461	-3.74503
554	277	11230	-3.38351	-3.81673
555	277.5	11237	-3.36221	-3.90413
556	278	11245	-3.26711	-3.88693
557	278.5	11252	-3.16691	-3.88793
558	279	11260	-2.99891	-3.94143
559	279.5	11267	-3.20641	-3.97883
560	280	11275	-3.19011	-4.41033
561	280.5	11283	-3.17621	-4.30203
562	281	11290	-3.46061	-4.17273
563	281.5	11298	-3.19771	-4.23013
564	282	11305	-3.47401	-4.25653
565	282.5	11313	-3.38681	-4.50663
566	283	11320	-3.09421	-4.13293
567	283.5	11328	-3.38121	-4.27603
568	284	11335	-3.73061	-4.21538
569	284.5	11343	-3.48621	-4.36298
571	285.5	11358	-3.47817	-4.38458
572	286	11366	-3.56697	-4.21558
573	286.5	11373	-3.62727	-4.25708
574	287	11381	-3.66947	-4.32098
575	287.5	11388	-3.50767	-4.36568
576	288	11396	-3.71637	-4.30428
577	288.5	11403	-3.56917	-4.20548
578	289	11411	-3.79647	-3.96458
579	289.5	11419	-3.67647	-3.79508
580	290	11426	-3.63457	-4.13218
581	290.5	11434	-3.62877	-4.23978
582	291	11441	-3.56067	-4.58668
583	291.5	11449	-3.74527	-4.44318
584	292	11456	-3.91247	-4.25518
585	292.5	11464	-3.85397	-4.09038
586	293	11471	-3.52837	-4.17798
587	293.5	11479	-3.51397	-4.14128
588	294	11487	-3.49157	-4.00708
589	294.5	11494	-3.56897	-4.15768
590	295	11502	-3.25057	-4.45098
591	295.5	11509	-3.40217	-4.40148
592	296	11517	-3.53967	-4.56758
593	296.5	11524	-3.42087	-4.53948
594	297	11532	-3.27717	-4.23078
595	297.5	11539	-3.41247	-4.10798
596	298	11547	-3.25927	-4.02548
597	298.5	11555	-3.15957	-4.22988
598	299	11562	-3.32927	-4.46108
599	299.5	11570	-3.23187	-4.54508
600	300	11577	-3.33577	-4.72518
601	300.5	11584	-3.61297	-4.68917
602	301	11592	-3.39537	-4.36177
603	301.5	11599	-3.60587	-4.38817
604	302	11607	-3.55791	-4.42637
605	302.5	11614	-3.52721	-4.20227
606	303	11621	-3.51951	-4.34247
607	303.5	11629	-3.48651	-4.25657
608	304	11636	-3.45491	-4.42807
609	304.5	11644	-3.69401	-4.41067
610	305	11651	-3.20411	-4.66957
611	305.5	11659	-3.54531	-4.62037
612	306	11666	-3.73151	-4.60017
613	306.5	11673	-3.68541	-4.68447
614	307	11681	-3.49721	-4.51207
615	307.5	11688	-3.47291	-4.56037
616	308	11696	-3.57081	-4.73087
617	308.5	11703	-3.49361	-4.57037
618	309	11711	-3.68701	-4.58727
619	309.5	11718	-3.71751	-4.32847
620	310	11725	-3.72781	-4.32087
621	310.5	11733	-3.70941	-4.30777
622	311	11740	-3.27371	-4.23867
623	311.5	11748	-3.48651	-4.38737
624	312	11755	-3.47171	-4.55357
625	312.5	11763	-3.38341	-4.60297
626	313	11770	-3.49951	-4.56247
627	313.5	11777	-3.46171	-4.58547
628	314	11785	-3.33731	-4.83237
629	314.5	11792	-3.41361	-4.83537
630	315	11800	-3.37631	-4.74927
631	315.5	11807	-3.41591	-4.588
632	316	11815	-3.23331	-4.808
633	316.5	11822	-3.30287	-4.801
634	317	11829	-3.17588	-4.837
635	317.5	11837	-3.32488	-4.868
636	318	11844	-3.78788	-4.691
637	318.5	11852	-3.35988	-4.761
638	319	11859	-3.36788	-4.806
639	319.5	11867	-3.46988	-5.123
640	320	11874	-3.41087	-4.982
641	320.5	11881	-3.52188	-4.809
642	321	11889	-3.18587	-4.809
643	321.5	11896	-3.11488	-5.167
644	322	11904	-3.21687	-5.018
645	322.5	11911	-3.33887	-4.751
646	323	11918	-3.27287	-4.704
647	323.5	11926	-3.13488	-4.694
648	324	11933	-3.01688	-4.903
649	324.5	11941	-3.37988	-5.244
650	325	11948	-3.28288	-4.201
651	325.5	11956	-3.41387	-2.465
652	326	11963	-3.04787	-3.529
654	327	11978	-2.69588	-4
655	327.5	11985	-2.82287	-4.825
656	328	11993	-2.80187	-4.383
657	328.5	12000	-3.13488	-4.674
658	329	12008	-2.98287	-4.798
659	329.5	12015	-3.08087	-4.512
660	330	12022	-3.16387	-4.723
661	330.5	12030	-2.93688	-4.53906
662	331	12037	-2.83588	-4.77406
663	331.5	12045	-3.10634	-4.73426
664	332	12052	-3.18744	-4.66516
665	332.5	12060	-3.38364	-4.95926
666	333	12067	-3.35014	-4.79846
667	333.5	12074	-3.34994	-4.09696
668	334	12082	-3.15424	-4.24306
669	334.5	12089	-2.94844	-4.97026
670	335	12096	-3.00204	-4.43216
671	335.5	12103	-3.27544	-4.35256
672	336	12110	-3.08424	-3.94966
673	336.5	12117	-3.12374	-3.52516
674	337	12124	-3.10644	-3.55046
675	337.5	12131	-3.22234	-3.60686
676	338	12138	-3.10774	-3.88076
677	338.5	12145	-2.87604	-3.92376
678	339	12152	-3.03514	-4.14216
679	339.5	12159	-3.05874	-4.21396
680	340	12166	-3.17614	-3.86546
681	340.5	12173	-3.17184	-3.77006
682	341	12180	-3.05094	-3.85846
683	341.5	12187	-2.98054	-3.69396
684	342	12194	-2.94434	-3.72436
685	342.5	12201	-3.04394	-3.70026
686	343	12208	-2.91404	-3.79166
687	343.5	12215	-2.79404	ND
688	344	12222	-2.82124	ND
